# Supplementary material for: Dopant effect on the optical and thermal properties of the 2D organic–inorganic hybrid perovskite (HDA)2PbBr4
Source: Royal Society of Chemistry journal article supplement (doi:10.1039/d3dt03841f), 2023-12-19
Supplement: d3dt03841f1.pdf [file d3dt03841f1.pdf]

## Support Information

# Dopant effect on the optical and thermal properties of 2D organic-Inorganic Hybrid Perovskite (HDA)<sub>2</sub>PbBr<sub>4</sub>

*Zhi Lin*<sup>[a], #</sup>, *Ya-Nan Wu*<sup>[a], #</sup>, *Si-Yu Xu*<sup>[a]</sup>, *Bi-Cui Chen*<sup>[a]</sup>, *Pei-Wen Huang*<sup>[a]</sup>, *Xing-Hui Qi*

*[b\*]*, *Yang-Peng Lin*<sup>[a\*]</sup>, *Ke-Zhao Du*<sup>[a\*]</sup>

[a] College of Chemistry and Materials Science, Fujian Provincial Key Laboratory of Advanced Materials Oriented Chemical Engineering, Fujian Normal University, Fuzhou, 350007, China

[b] Joint School of National University of Singapore and Tianjin University, International Campus of Tianjin University, Fuzhou 350207, China

*\*Correspondent Emails:*

*duke@fjnu.edu.cn (K.-Z. D.)*

*xhqi@tjufz.org.cn (X. Q.),*

*lyp.fjnu@outlook.com*

*# These authors contribute equally to this work.*

---

## Experimental Section:

**Materials:** lead (II) bromide ( $\text{PbBr}_2$ , 99%, Adamas), hydrobromic acid ( $\text{HBr}$ , 48%w/w, Aladdin), methanol ( $\text{CH}_3\text{OH}$ ,  $\geq 99.5\%$ , Aladdin), ethyl acetate ( $\text{C}_4\text{H}_8\text{O}_2$ , 99.50%, Shanghai Shenbo Chemical), anhydrous diethyl ether( $(\text{C}_2\text{H}_5)_2\text{O}$ , AR, Greagent), dopamine hydrochloride ( $\text{C}_8\text{H}_{11}\text{NO}_2\cdot\text{HCl}$ , 98%, Aladdin), manganese (II) oxide ( $\text{MnO}$ , 99.5% Macklin), antimony (III) oxide ( $\text{Sb}_2\text{O}_3$ , 99%, Adamas), bismuth (III) oxide ( $\text{Bi}_2\text{O}_3$ , 99%, Adamas),

**Preparation of  $(\text{HDA})_2\text{PbBr}_4$**  Stoichiometric amounts of  $\text{PbBr}_2$  (22.0 mg, 0.06 mmol) and  $\text{C}_8\text{H}_{11}\text{NO}_2\cdot\text{HCl}$  (22.8 mg, 0.12 mmol) were dissolved in concentrated hydrobromic acid (0.5 mL). Then, 1 mL  $\text{CH}_3\text{OH}$  was slowly added on the top of the mixed solution along the wall of bottle. After 3 days, we can obtain the colorless flakes crystals in the bottom of the bottle. The yield of  $(\text{HDA})_2\text{PbBr}_4$  single crystal is 25% - 35% (based on Pb).

**Preparation of Mn-1 single crystal.** Stoichiometric amounts of  $\text{PbBr}_2$  (110.1 mg, 0.3 mmol),  $\text{C}_8\text{H}_{11}\text{NO}_2\cdot\text{HCl}$  (113.8 mg, 0.6 mmol) and  $\text{MnO}$  (120.6 mg, 1.7 mmol) were dissolved in concentrated hydrobromic acid (2.5 mL). Then, 2.5 mL  $(\text{C}_2\text{H}_5)_2\text{O}$  was slowly added on the top of the mixed solution along the wall of bottle. After 3-5 days, kept at room temperature, we can obtain the colorless gray flake crystals in the bottom of the bottle.  $\text{Mn}^{2+}$  doped  $(\text{HDA})_2\text{PbBr}_4$  samples with different doping concentration were synthesized by increasing  $\text{MnO}$  with corresponding stoichiometric ratio.

**Preparation of Sb-1 single crystal.** Stoichiometric amounts of  $\text{PbBr}_2$  (110.1 mg, 0.3 mmol),  $\text{C}_8\text{H}_{11}\text{NO}_2\cdot\text{HCl}$  (113.8 mg, 0.6 mmol) and  $\text{Sb}_2\text{O}_3$  (145.8 mg, 0.5 mmol) were dissolved in concentrated hydrobromic acid (2.5 mL). Then, 2.5 mL  $\text{C}_4\text{H}_8\text{O}_2$  was slowly added on the top of the mixed solution along the wall of bottle. After 3-5 days, kept at room temperature, we can obtain the yellow flake transparent crystals in the bottom of the bottle.  $\text{Sb}^{3+}$  doped  $(\text{HDA})_2\text{PbBr}_4$  samples with different doping concentration were synthesized by increasing  $\text{Sb}_2\text{O}_3$  with corresponding stoichiometric ratio.

**Preparation of Bi-1 single crystal.** Stoichiometric amounts of  $\text{PbBr}_2$  (88.0 mg, 0.24 mmol),  $\text{C}_8\text{H}_{11}\text{NO}_2\cdot\text{HCl}$  (91.0 mg, 0.48 mmol) and  $\text{Bi}_2\text{O}_3$  (93.2 mg, 0.2 mmol) were dissolved in concentrated hydrobromic acid (2 mL). Then, 2 mL  $\text{C}_4\text{H}_8\text{O}_2$  was slowly added on the top of the mixed solution along the wall of bottle. After 3-5 days, kept

---

at room temperature, we can obtain the deep brown crystals in the bottom of the bottle. Bi<sup>3+</sup> doped (HDA)<sub>2</sub>PbBr<sub>4</sub> samples with different doping concentration were synthesized by increasing Bi<sub>2</sub>O<sub>3</sub> with corresponding stoichiometric ratio.

**Powder X-ray diffraction (PXRD) measurements.** The PXRD data was obtained using Rigaku Miniflex diffractometer (Cu K $\alpha$ ,  $\lambda = 1.5418 \text{ \AA}$ ) at room temperature in the range of  $2\theta = 5 - 65^\circ$ . The simulated PXRD pattern was calculated by Mercury software according to the corresponding CIF file of single crystal.

**ICP-OES.** American Agilent ICP-OES 730.

**X-ray photoelectron spectroscopy (XPS) measurements.** XPS spectra were analyzed by Thermo ESCALAB 250Xi.

**EDS.** EDS was obtained by a JSM - 7500F, JEOL scanning electron microscope (SEM).

**UV/Vis Spectra.** The UV/vis spectra were recorded within the 800 – 200 nm range using an UV-2600 spectrometer from Shimadzu at room temperature.

**TGA.** TG analysis was proceeded on a NETZSCH STA 449F3 instrument at a heating rate of  $10 \text{ K min}^{-1}$  under a dry N<sub>2</sub> atmosphere from 20 to 1000 °C.

**DSC.** DSC analysis was proceeded on a TA - Q20 of American instrument. The DSC of 1 and PDA-1 was conducted from 30 to 230 °C under a nitrogen atmosphere at a heating/cooling rate of  $5 \text{ K min}^{-1}$ .

**Photoluminescence.** Room time PL and PLE were recorded on PerkinElmer LS55 fluorescence spectrometer.

**PL decay spectra.** FLS1000 Photoluminescence Spectrometer, Edinburgh Instruments Ltd. Variation Photoluminescence spectrometer was measured at FLS1000 Photoluminescence Spectrometer (Edinburgh Instruments Ltd) equipped with a liquid-nitrogen cooled photomultiplier tube as a detector (Hamamatsu, R5509, InP/InGaAsP).

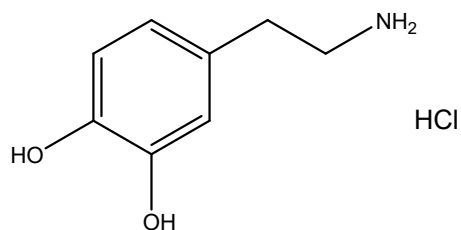

Figure S1. Structural formula of protonated dopamine.

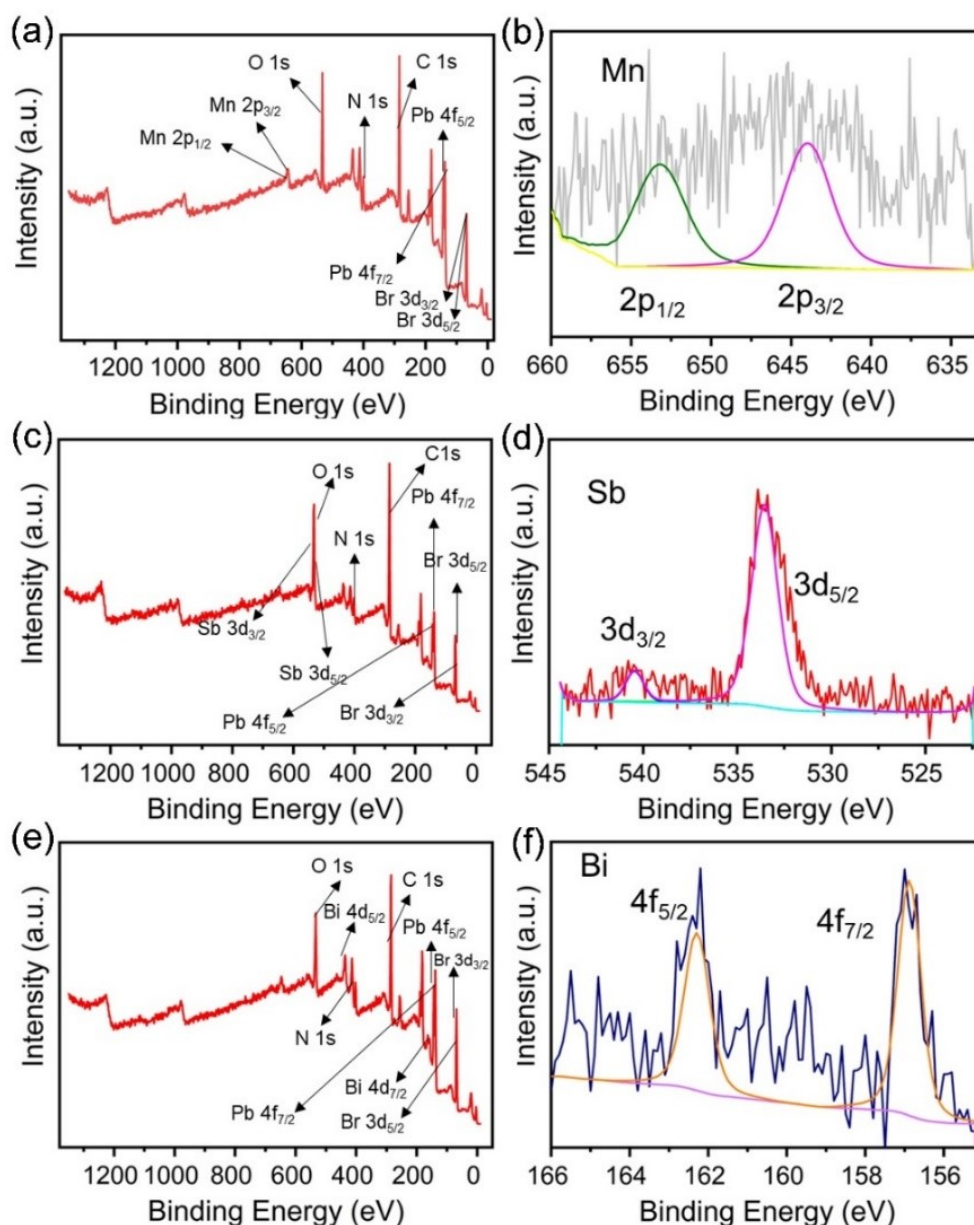

Figure S2. (a) The XPS spectrum of Mn-1 survey scan; (b) Fine spectrum of 2p orbital of Mn in crystal Mn-1; (c) The XPS spectrum of Sb-1 survey scan; (d) Fine spectrum of 3d orbital of Sb in crystal Sb-1; (e) The XPS spectrum of Bi-1 survey scan; (f) Fine spectrum of 4f orbital of Bi in Bi-1 crystal.

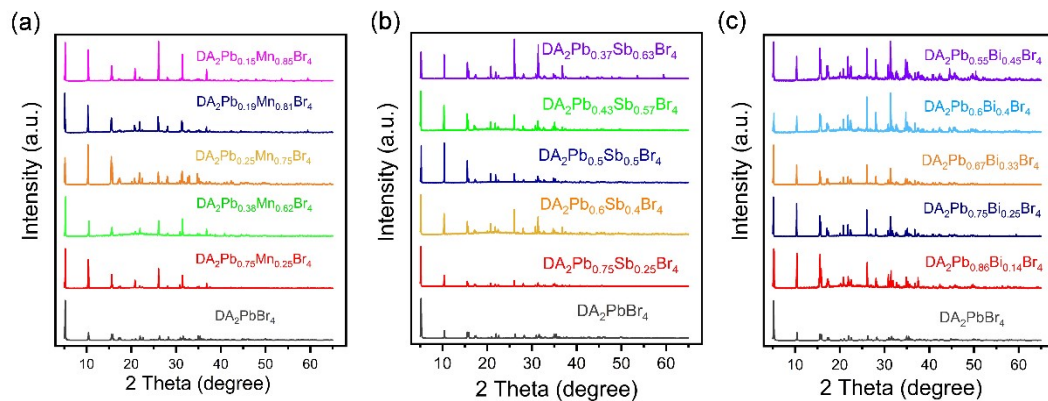

Figure S3. (a) PXRD patterns of crystal **1** doped  $\text{Mn}^{2+}$  with different Mn concentrations; (b) PXRD patterns of crystal **Sb-1** with different Sb concentrations; (c) PXRD patterns of crystal **Bi-1** with different Bi concentrations.

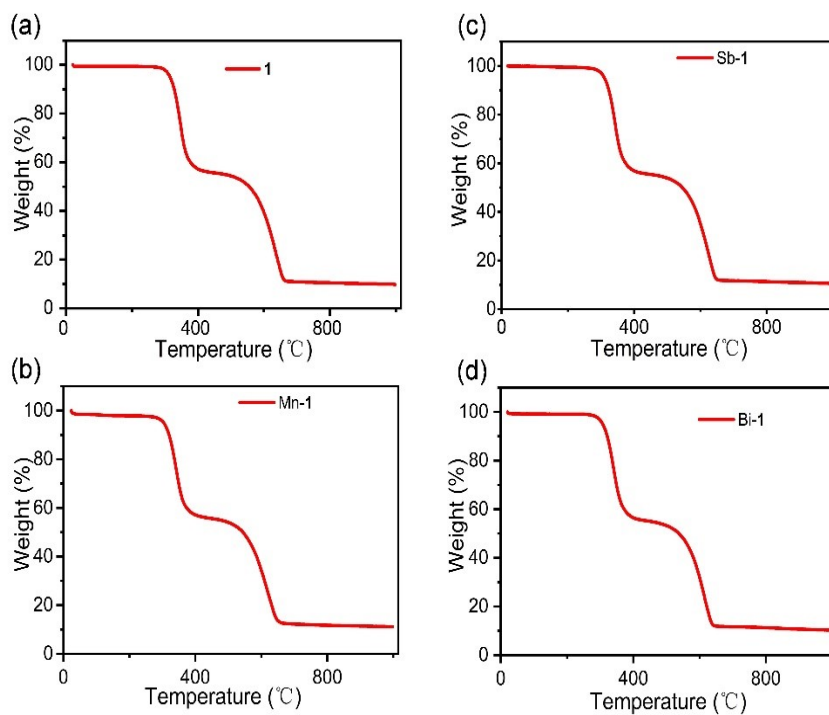

Figure S4. (a)-(d) Thermogravimetric curve of crystal **1**, **Mn-1**, **Sb-1**, **Bi-1**.

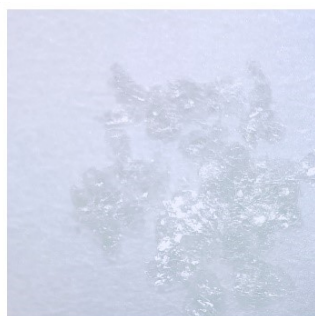

Figure S5. Photos of crystal **1**

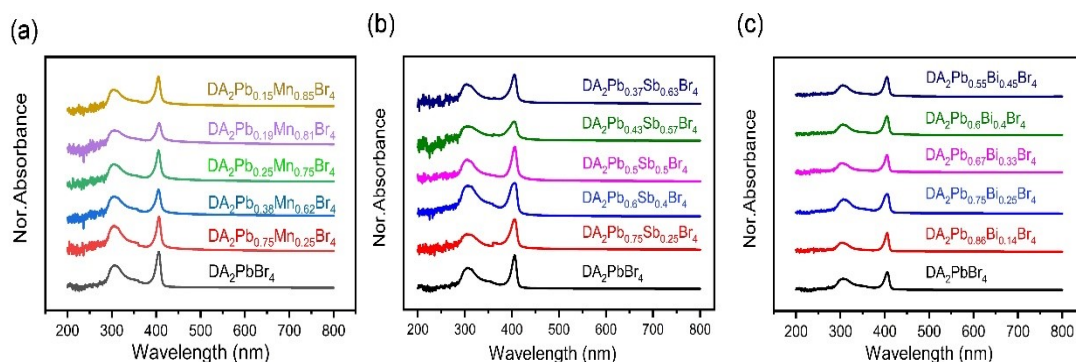

Figure S6. (a) Ultraviolet absorption spectra of crystal **1** doped  $\text{Mn}^{2+}$  at different concentrations; (b) Ultraviolet absorption spectra of crystal **1** doped  $\text{Sb}^{3+}$  at different concentrations; (c) Ultraviolet absorption spectra of crystal **1** doped  $\text{Bi}^{3+}$  at different concentrations. The atomic ratio in the formula represents the feeding ratio.

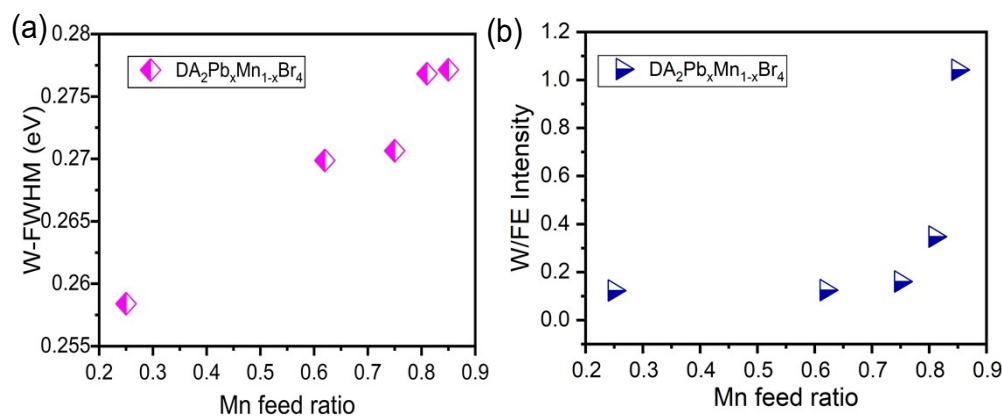

Figure S7. Variation trend of FWHM of peak W with the increase of Mn doping concentration; (b) The ratio of fluorescence intensity of peak W to the peak FE with the increase of Mn doping concentration.

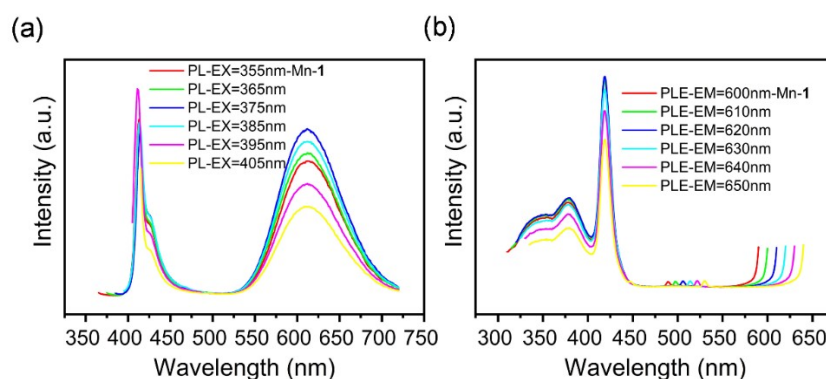

Figure S8. (a) Wavelength-dependent PL spectra of Mn-1 at room temperature; (b)

Wavelength-dependent PLE spectra of Mn-1 at room temperature.

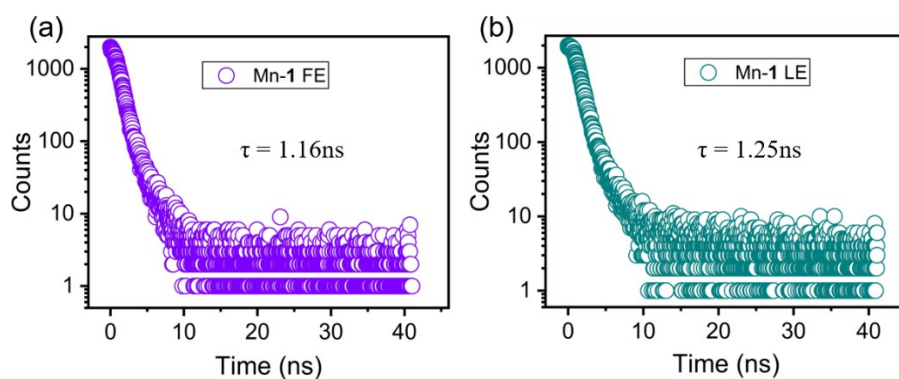

Figure S9. PL lifetime of peak FE of crystal Mn-1 at room temperature; (b) PL lifetime of peak LE of crystal Mn-1 at room temperature.

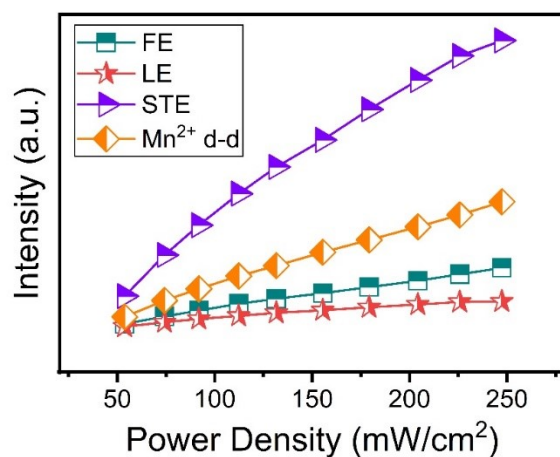

Figure S10. Powder density-dependent PL intensity of peak FE, LE, STE and  $\text{Mn}^{2+}$  d-d in Mn-1 at 80K.

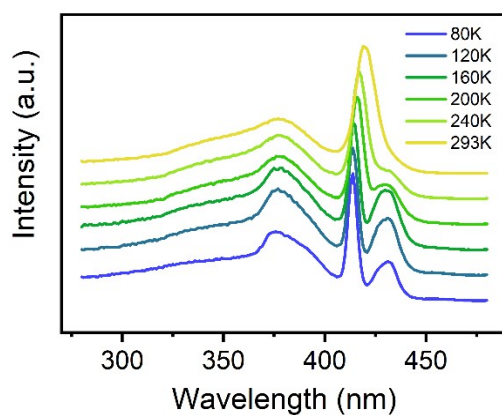

Figure S11. Temperature-dependent PLE spectra of Mn-1.



The emission wavelength is 650 nm.

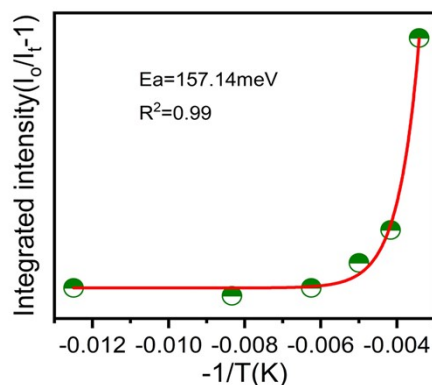

Figure S12 Temperature dependent integrated intensity of 430 nm peak in the PLE of Mn-1 sample. The data is fitted by Arrhenius formula.

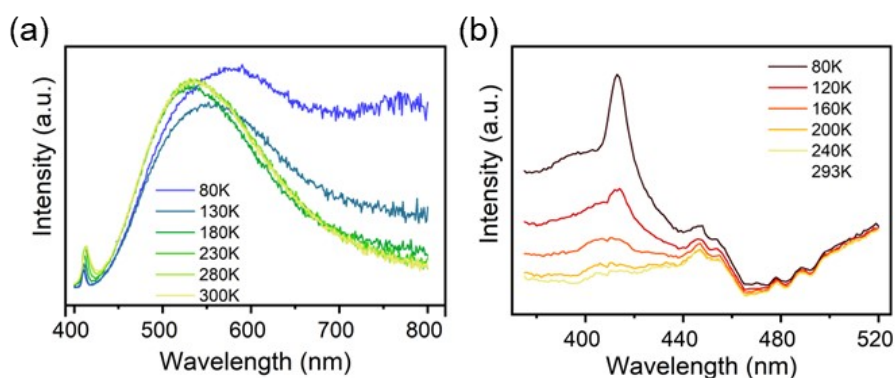

Figure S13. (a) Temperature-dependent PL spectra of Sb-1. The excitation wavelength is 375 nm (b) Temperature-dependent PLE spectra of Sb-1. The emission wavelength is 750 nm.

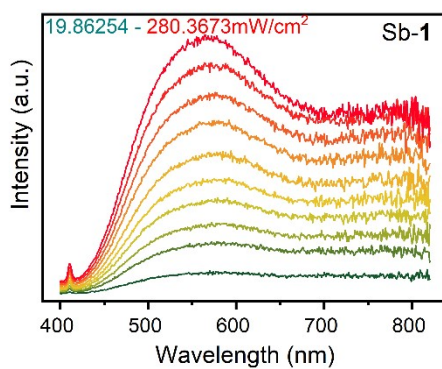

Figure S14. Powder density-dependent PL spectra of Sb-1 at 80K. The excitation wavelength is 375 nm.



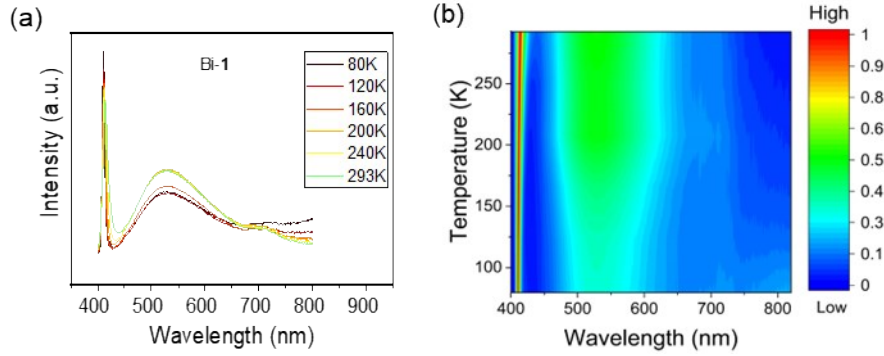

Figure S15. (a) Temperature-dependent PL spectra of Bi-1. The excitation wavelength is 365 nm. (b) Pseudo-color PL image of Bi-1 under different temperatures.

Table S1. ICP-OES data of doping with different doping concentrations of  $Mn^{2+}$  and maximum doping concentration of  $Sb^{3+}$  and  $Bi^{3+}$ .

| Mn-to-Pb molar feed ratio (nominal) | Actual concentration% | $Pb^{2+}$ Actual concentration% | $Mn^{2+}$ actual $Mn^{2+}$ -to- $Pb^{2+}$ molar ratio |
|-------------------------------------|-----------------------|---------------------------------|-------------------------------------------------------|
| $DA_2Pb_{0.75}Mn_{0.15}Br_4$        | 0.1234%               | 0.00019%                        | 0.00154%                                              |
| $DA_2Pb_{0.38}Mn_{0.62}Br_4$        | 0.1192%               | 0.0014%                         | 0.0117%                                               |
| $DA_2Pb_{0.25}Mn_{0.75}Br_4$        | 0.1226%               | 0.00178%                        | 0.01451%                                              |
| $DA_2Pb_{0.19}Mn_{0.81}Br_4$        | 0.1222%               | 0.0027%                         | 0.0027%                                               |
| $DA_2Pb_{0.15}Mn_{0.85}Br_4$        | 0.123%                | 0.0063%                         | 0.051%                                                |

  

| Sb-to-Pb molar feed ratio (nominal) | Actual concentration% | $Pb^{2+}$ Actual concentration% | $Sb^{3+}$ Actual $Sb^{3+}$ -to- $Pb^{2+}$ molar ratio |
|-------------------------------------|-----------------------|---------------------------------|-------------------------------------------------------|
| $DA_2Pb_{0.37}Sb_{0.63}Br_4$        | 0.121%                | 0.00220%                        | 0.0181%                                               |

  

| Bi-to-Pb molar feed ratio (nominal) | Actual concentration% | $Pb^{2+}$ Actual concentration% | $Bi^{3+}$ Actual $Bi^{3+}$ -to- $Pb^{2+}$ molar ratio |
|-------------------------------------|-----------------------|---------------------------------|-------------------------------------------------------|
| $DA_2Pb_{0.55}Bi_{0.45}Br_4$        | 0.1174%               | 0.0013%                         | 0.011%                                                |

Table S2. EDS data sheet with different ions doped.

|      | Element | Weight % | Atomic % |
|------|---------|----------|----------|
| Mn-1 | Br L    | 26.78    | 7.19     |
|      | Pb M    | 14.19    | 1.47     |
|      | Mn K    | 0.31     | 0.12     |
| Sb-1 | Br L    | 29.92    | 8.31     |
|      | Pb M    | 14.92    | 1.60     |
|      | Sb L    | 0.12     | 0.02     |
| Bi-1 | Br L    | 26.94    | 7.25     |
|      | Pb M    | 13.48    | 1.40     |
|      | Bi M    | 1.80     | 6.71     |

Table S3. Room-temperature PL data of Mn<sup>2+</sup> doped. W/FE represents the intensity ratio of the peak W to the peak FE.

|                                                                       | Peak W<br>FWHM<br>(eV) | Peak W<br>(Intensity) | Peak FE<br>(Intensity) | W/FE   |
|-----------------------------------------------------------------------|------------------------|-----------------------|------------------------|--------|
| DA <sub>2</sub> Pb <sub>0.75</sub> Mn <sub>0.25</sub> Br <sub>4</sub> | 0.25841                | 2.26923E6             | 1.8451E7               | 0.1230 |
| DA <sub>2</sub> Pb <sub>0.38</sub> Mn <sub>0.62</sub> Br <sub>4</sub> | 0.26988                | 1.24457E6             | 1.0007E7               | 0.1244 |
| DA <sub>2</sub> Pb <sub>0.25</sub> Mn <sub>0.75</sub> Br <sub>4</sub> | 0.27065                | 2.86525E6             | 1.7817E7               | 0.1608 |
| DA <sub>2</sub> Pb <sub>0.19</sub> Mn <sub>0.81</sub> Br <sub>4</sub> | 0.27683                | 1.67419E6             | 4.8241E6               | 0.3407 |
| DA <sub>2</sub> Pb <sub>0.15</sub> Mn <sub>0.85</sub> Br <sub>4</sub> | 0.27714                | 7.41017E6             | 7.1064E6               | 1.0427 |

Table S4. Power-dependent FWHM data of peak FE and LE in Mn-1 at 80K.

| Mn-1-80K-Power<br>Density (mW/c<br>m <sup>2</sup> ) | FE-integrated<br>intensity | LE-<br>integrated<br>intensity | FE-area<br>percentage | LE-area<br>percentage |
|-----------------------------------------------------|----------------------------|--------------------------------|-----------------------|-----------------------|
|-----------------------------------------------------|----------------------------|--------------------------------|-----------------------|-----------------------|

|          |             |             |          |          |
|----------|-------------|-------------|----------|----------|
| 19.86254 | 13470.37491 | 16159.36554 | 45.46235 | 54.53765 |
| 47.36451 | 31165.94907 | 36891.19278 | 45.7938  | 54.2062  |
| 71.04677 | 44630.03085 | 50662.57657 | 46.83473 | 53.16527 |
| 98.54874 | 61159.57342 | 63545.23277 | 49.04348 | 50.95652 |
| 124.5228 | 71415.36428 | 79848.98831 | 47.21229 | 52.78771 |
| 156.6085 | 87128.24302 | 87727.26698 | 49.82871 | 50.17129 |
| 188.6941 | 102981.3988 | 97986.40625 | 51.24273 | 48.75727 |
| 222.3076 | 121403.8529 | 109503.1142 | 52.57696 | 47.42304 |
| 251.3375 | 134660.0381 | 127828.214  | 51.30136 | 48.69864 |
| 280.3673 | 152119.4103 | 130441.5095 | 53.83597 | 46.16403 |

Table S5. Temperature-dependent peak position and FWHM of peak FE and LE in Mn-1.

|      | <b>Peak Position-FE</b> | <b>FWHM-FE</b> | <b>Peak Position-LE</b> | <b>FWHM-LE</b> |
|------|-------------------------|----------------|-------------------------|----------------|
| 80K  | 3.02002                 | 0.01886        | 2.99673                 | 0.05936        |
| 120K | 3.01792                 | 0.02083        | 2.99778                 | 0.05877        |
| 160K | 3.01381                 | 0.02581        | 2.98948                 | 0.06866        |
| 200K | 3.00898                 | 0.03193        | 2.97466                 | 0.08596        |
| 240K | 3.00426                 | 0.03878        | 2.95487                 | 0.10069        |
| 293K | 2.99672                 | 0.0486         | 2.92368                 | 0.13906        |

Table S6. Temperature-dependent FWHM of exciton peak in the PL spectra of Sb-1.

|      | <b>FWHM</b> | <b>Peak Position (eV)</b> |
|------|-------------|---------------------------|
| 80K  | 0.03299     | 3.01816                   |
| 120K | 0.03631     | 3.01637                   |
| 160K | 0.04273     | 3.01299                   |

|      |         |         |
|------|---------|---------|
| 200K | 0.04746 | 3.00831 |
| 240K | 0.05879 | 3.00085 |
| 293K | 0.06072 | 2.99794 |

Table S7. Temperature-dependent FWHM of exciton peak in the PL spectra of Bi-1.

|      | <b>FWHM (eV)</b> | <b>Peak Position (eV)</b> |
|------|------------------|---------------------------|
| 80K  | 0.04524          | 3.02067                   |
| 120K | 0.04879          | 3.01926                   |
| 160K | 0.05369          | 3.01611                   |
| 200K | 0.06108          | 3.01134                   |
| 240K | 0.06533          | 3.00489                   |
| 293K | 0.07649          | 2.99618                   |
